# Supplementary material for: Photocatalytic Synthesis of Coumarin Derivatives Using Visible-Light-Responsive Strawberry Dye-Sensitized Titanium Dioxide Nanoparticles
Source: MDPI journal article supplement (doi:10.3390/nano13233001), 2023-11-22

## **Supplementary materials**

# **Photocatalytic Synthesis of Coumarin Derivatives Using Visible-Light-Responsive Strawberry Dye-Sensitized Titanium Dioxide Nanoparticles**

Mshari A. Alotaibi <sup>1,\*</sup>, Abdulrahman I. Alharthi <sup>1</sup>, Talal F. Qahtan <sup>2</sup>, Satam Alotibi <sup>2</sup>, Amani M. Alansi <sup>3</sup>  
and Md. Afroz Bakht <sup>1</sup>

<sup>1</sup> Chemistry Department, College of Science and Humanities,  
Prince Sattam Bin Abdulaziz University, P.O. Box 83, Al-Kharj 11942, Saudi Arabia;  
a.alharthi@psau.edu.sa (A.I.A.); m.bakht@psau.edu.sa (M.A.B.)

<sup>2</sup> Department of Physics, College of Science and Humanities, Prince Sattam Bin Abdulaziz University,  
P.O. Box 173, Al-Kharj 11942, Saudi Arabia; t.qahtan@psau.edu.sa (T.F.Q.); sf.alotibi@psau.edu.sa (S.A.)

<sup>3</sup> Chemistry Department, King Saud University, P.O. Box 2455, Riyadh 12372, Saudi Arabia;  
amanielansi92@gmail.com

\* Correspondence: alosaimi@psau.edu.sa

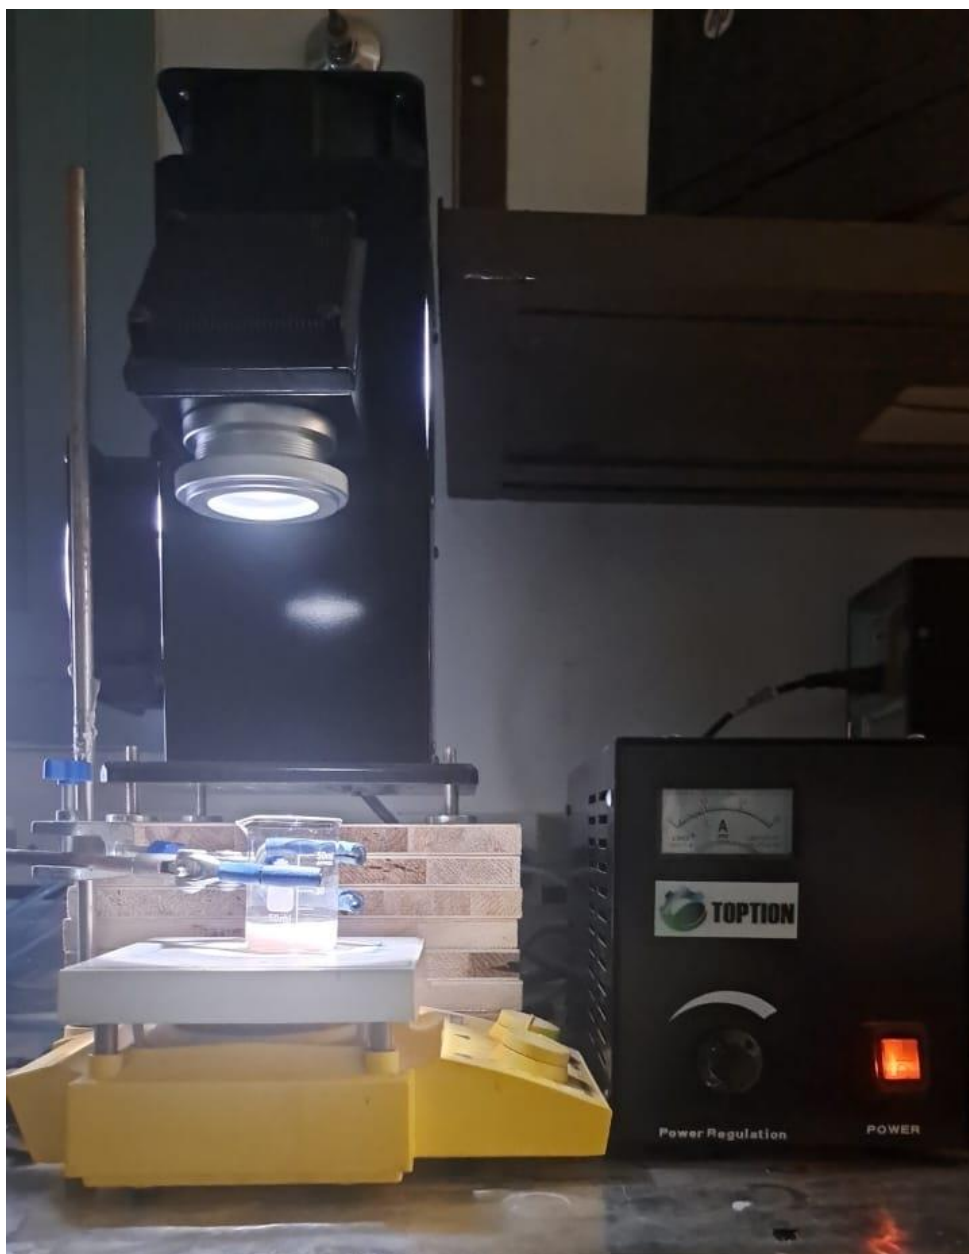

**Figure S1.** The digital images for reaction setup along with lamb sources (UV-vis light using a 500W Xenon/UV cut-off filter ( $< 420$  nm)).

**Figure S2.** NMR Data of synthesized compounds (**4a-h**).

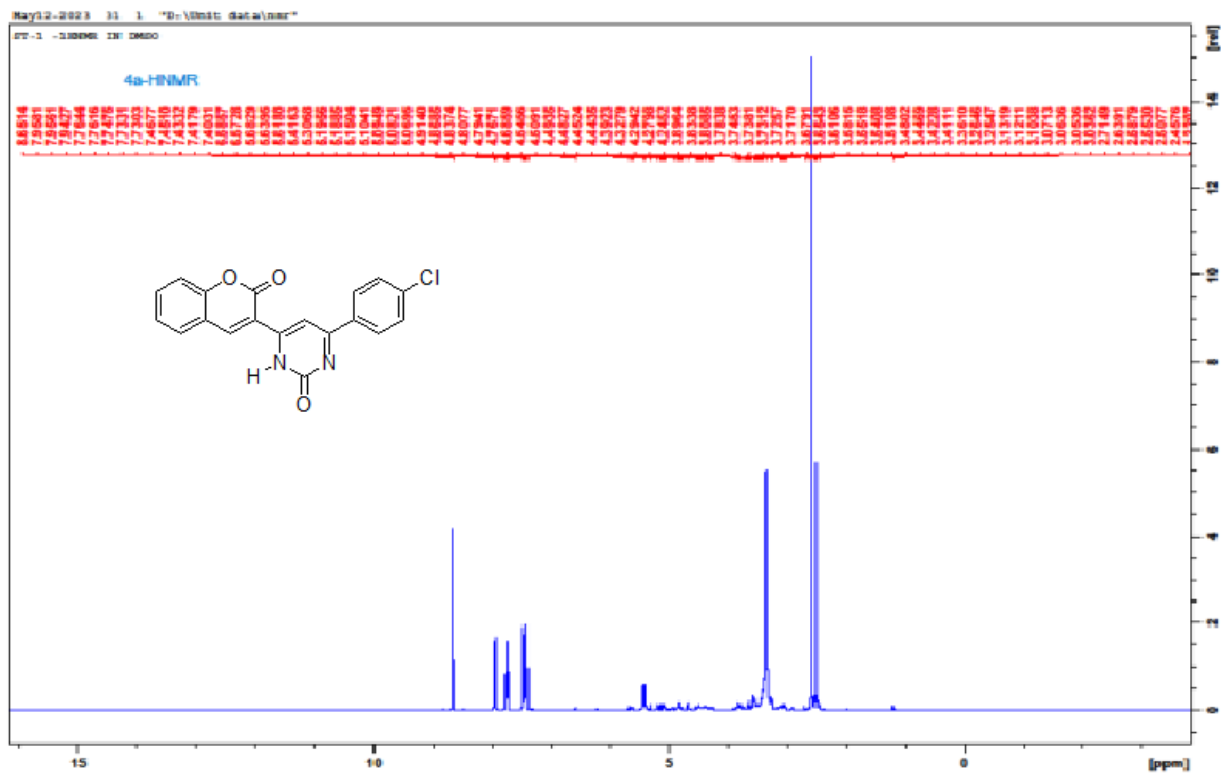

May12-2023 32 1 \*D:\Unit data\nmr\*

ST-1 C13 IN DMSO

4a-13CNMR

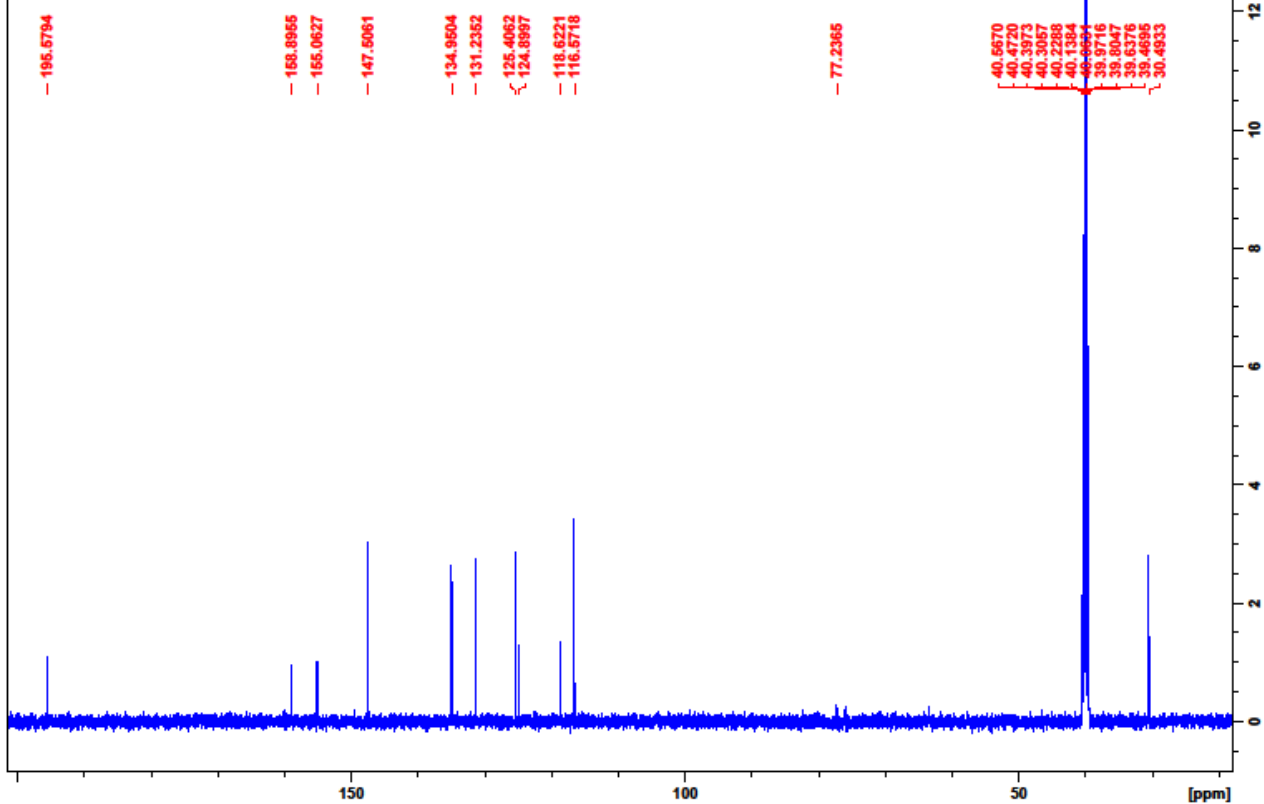

May18-2023 20 1 \*D:\Unit data\nmr\*

BT-6 - 100MHz - IN DMF0

4b-1HNMR

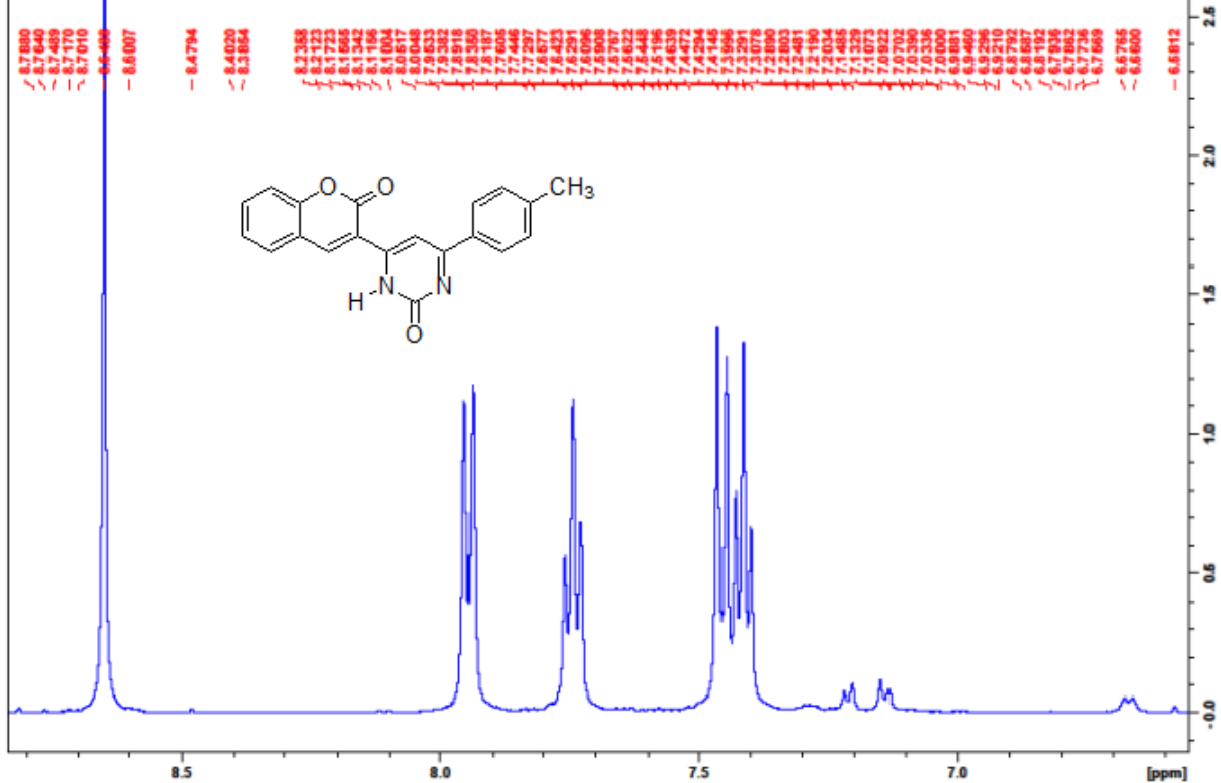

May18-2023 22 1 "D:\Unit data\nmr"

ST-6 - C13 - IN DMSO

4b-13CNMR

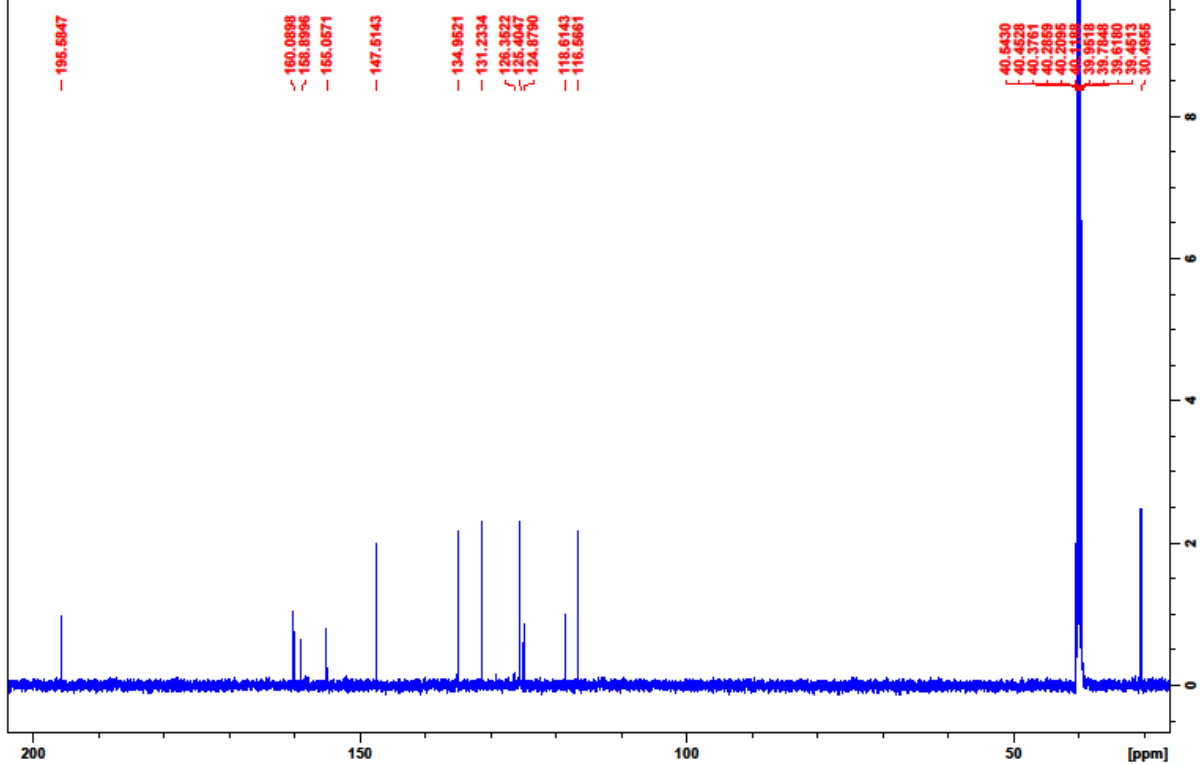

## 4c-1HNMR

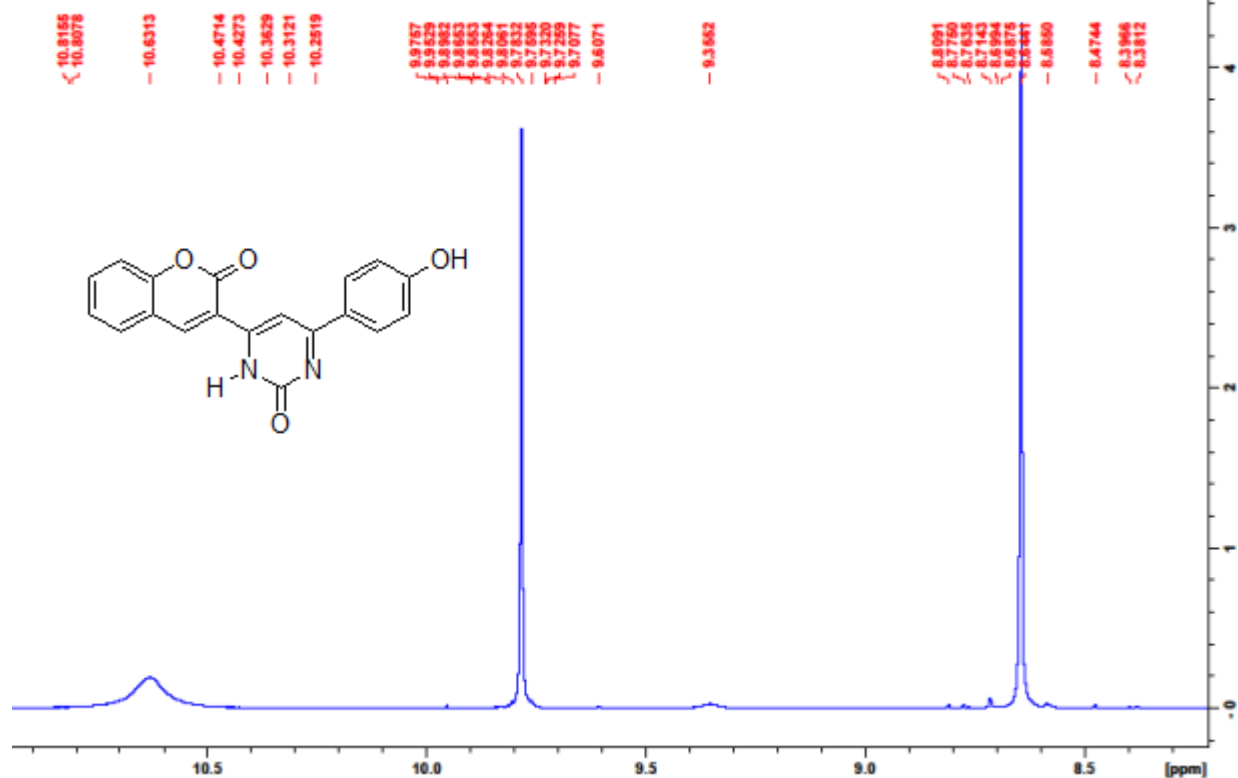

May16-2023 22 1 "D:\Unit data\nmr"

BT-3 - C13 - IN DMSO

4c-13CNMR

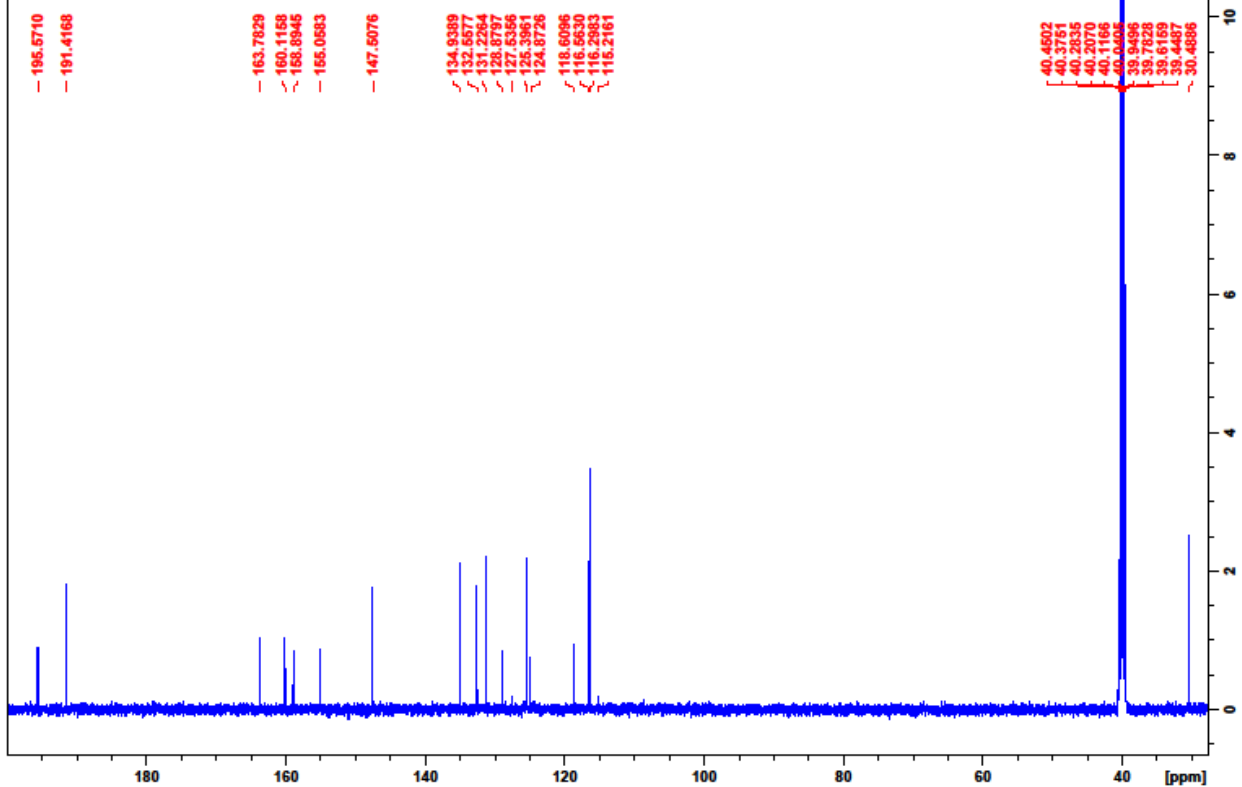



May18-2023 31 1 \*D:\Unit data\hmr\*

ST-7 - 1H NMR - IN DMSO

4d-1HNMR

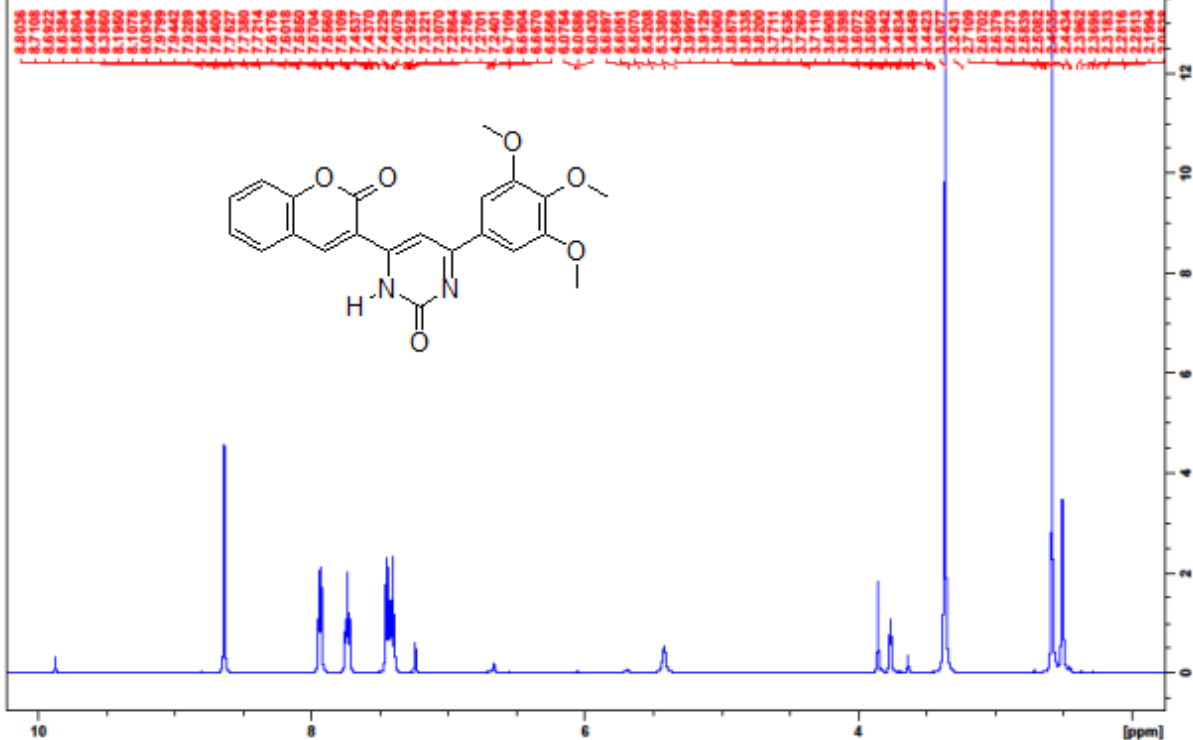

May18-2023 32 1 "D:\Unit data\nmr"

ST-7 - C13 - IN DMSO

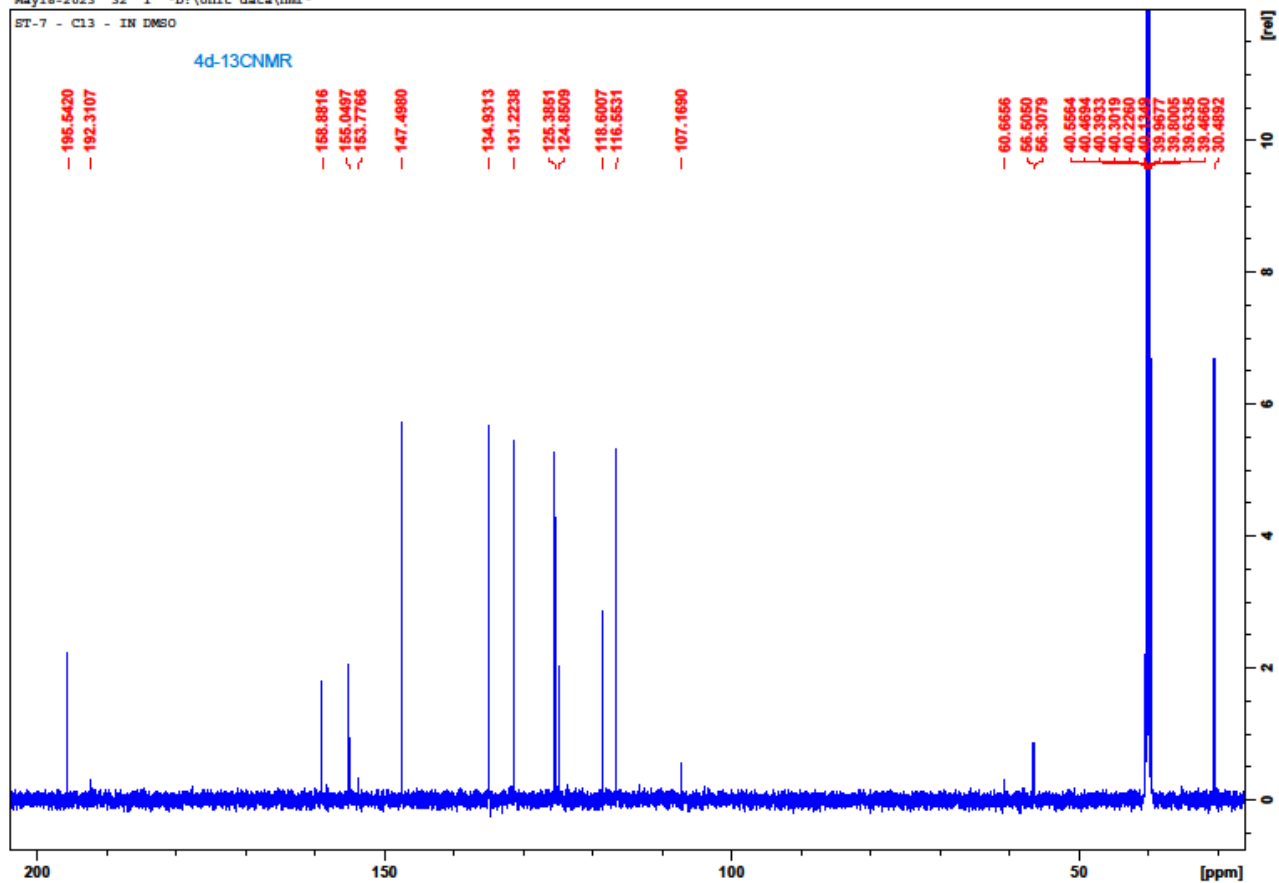

May15-2023 31 1 \*D:\Unit data\nmr\*

ST-2 - 1HNMR - IN DMSO

4e-1 1HNMR

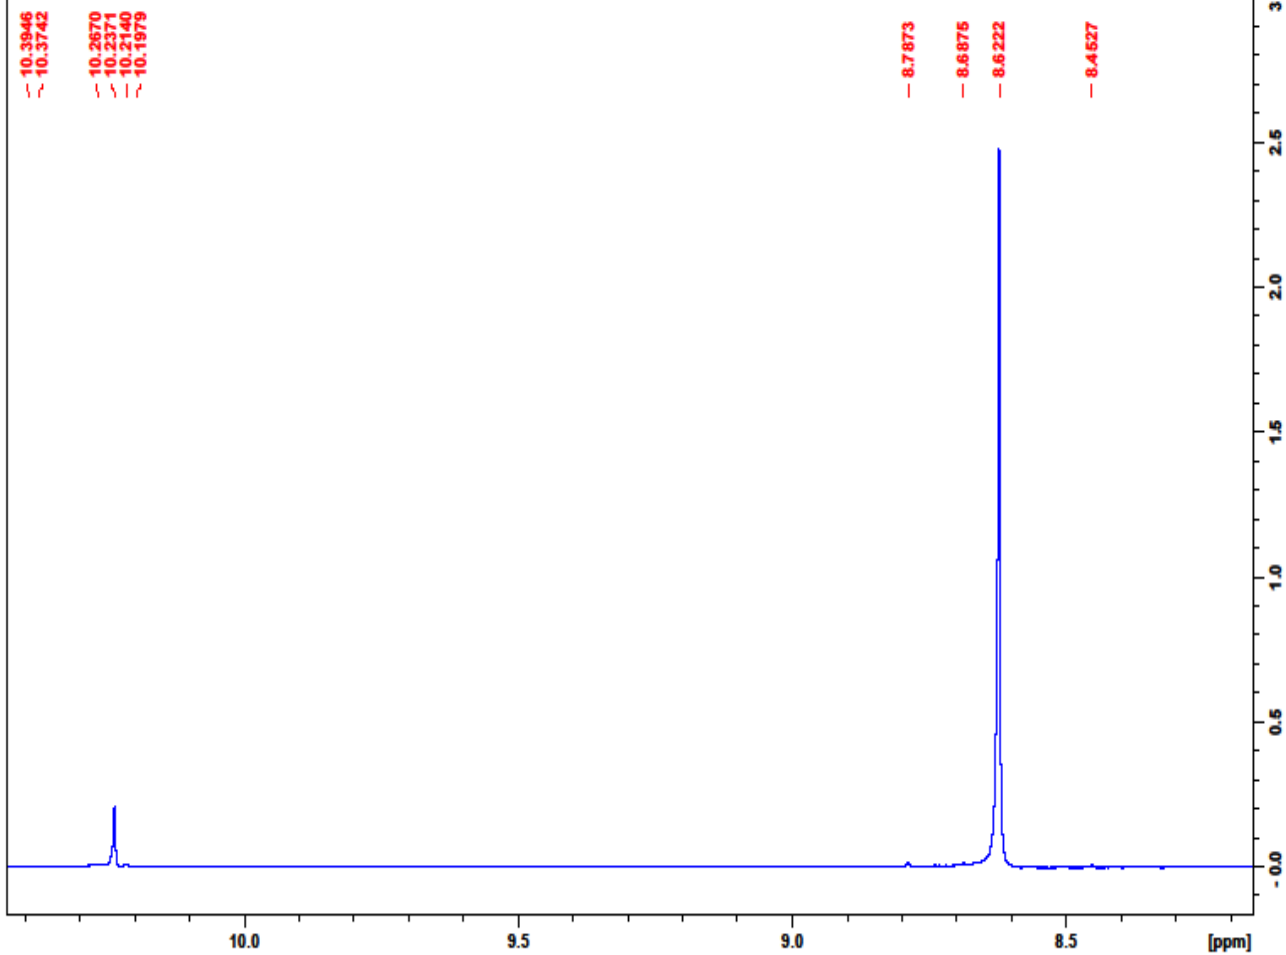

May15-2023 31 1 "D:\Unit data\nmr"

ST-2 - 100000 - IN DMF-D

4e-2 1HNMR

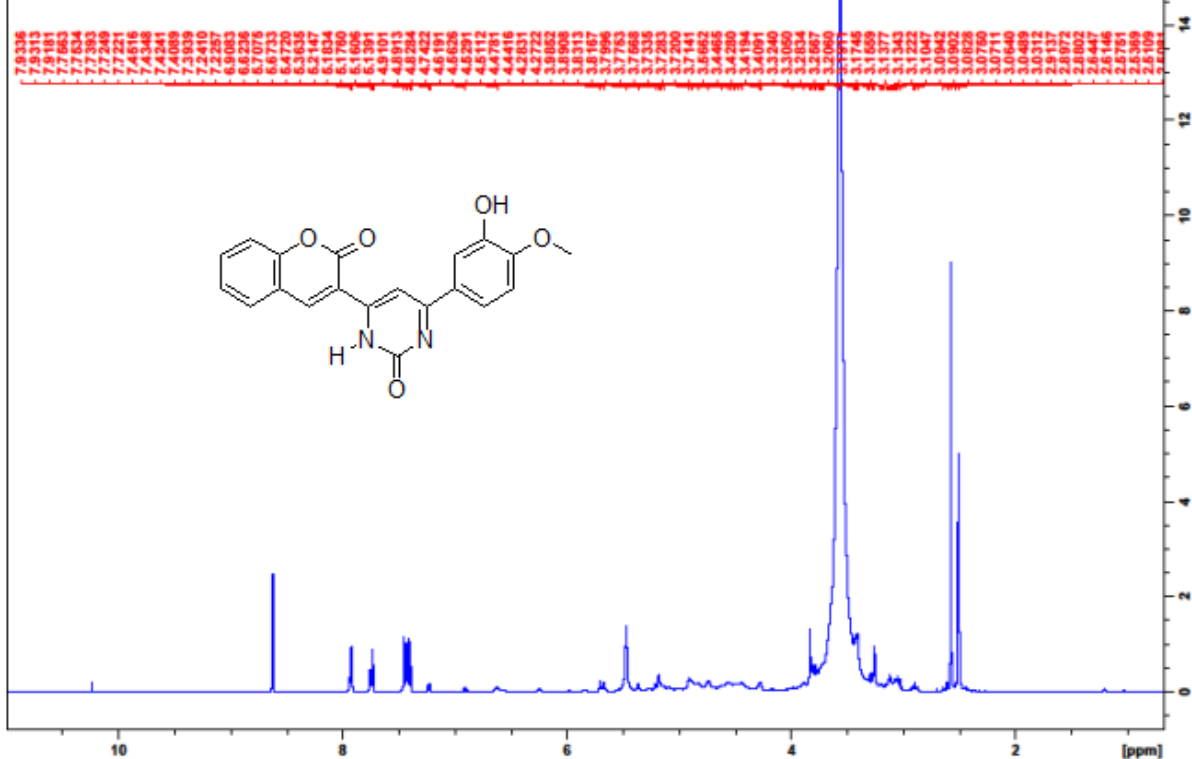

May15-2023 32 1 \*D:\Unit data\nmr\*

ST-2 - C13 - IN DMSO

4e-13CNMR

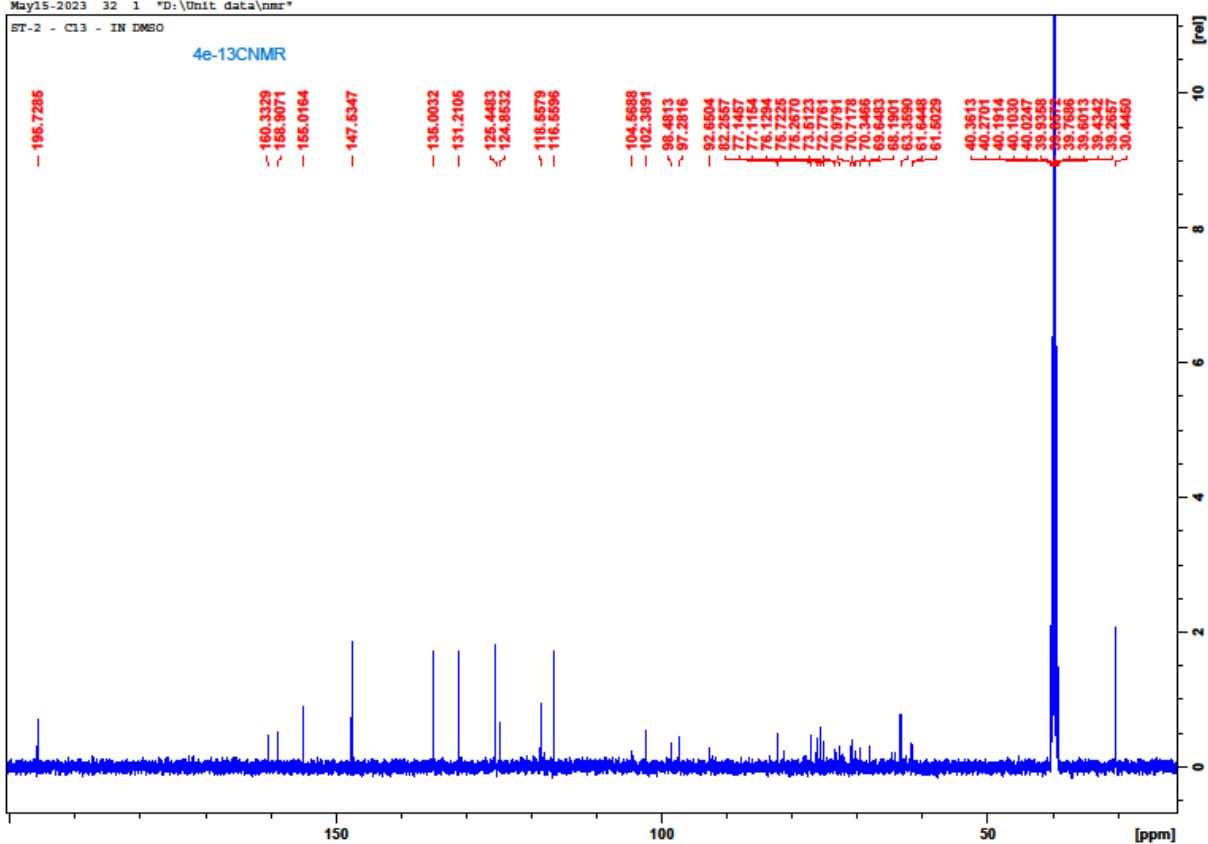



May18-2023 12 1 "D:\Unit data\nmr"

ST-5 - C13 - IN DMSO

4f-13CNMR

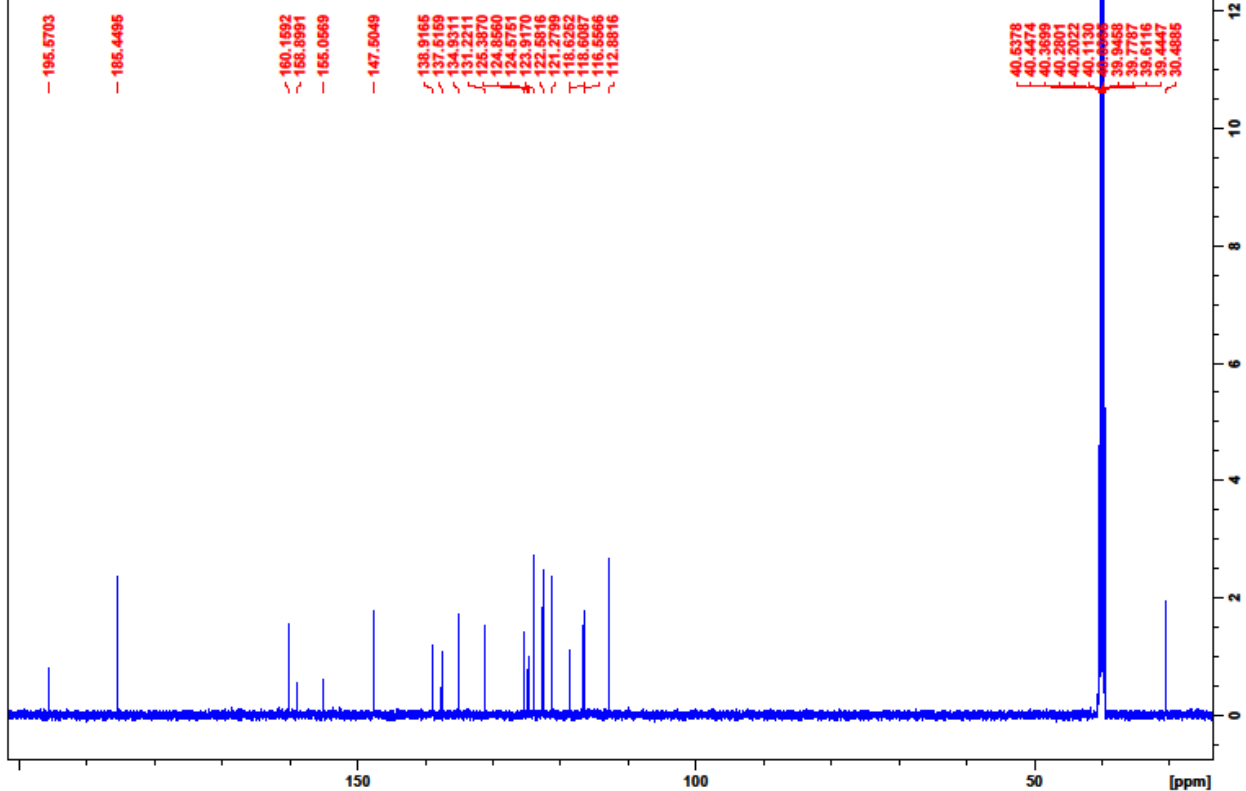

May16-2023 31 1 \*D:\Unit data\lme\*

BT-4 - 1HMR - IN DMSO

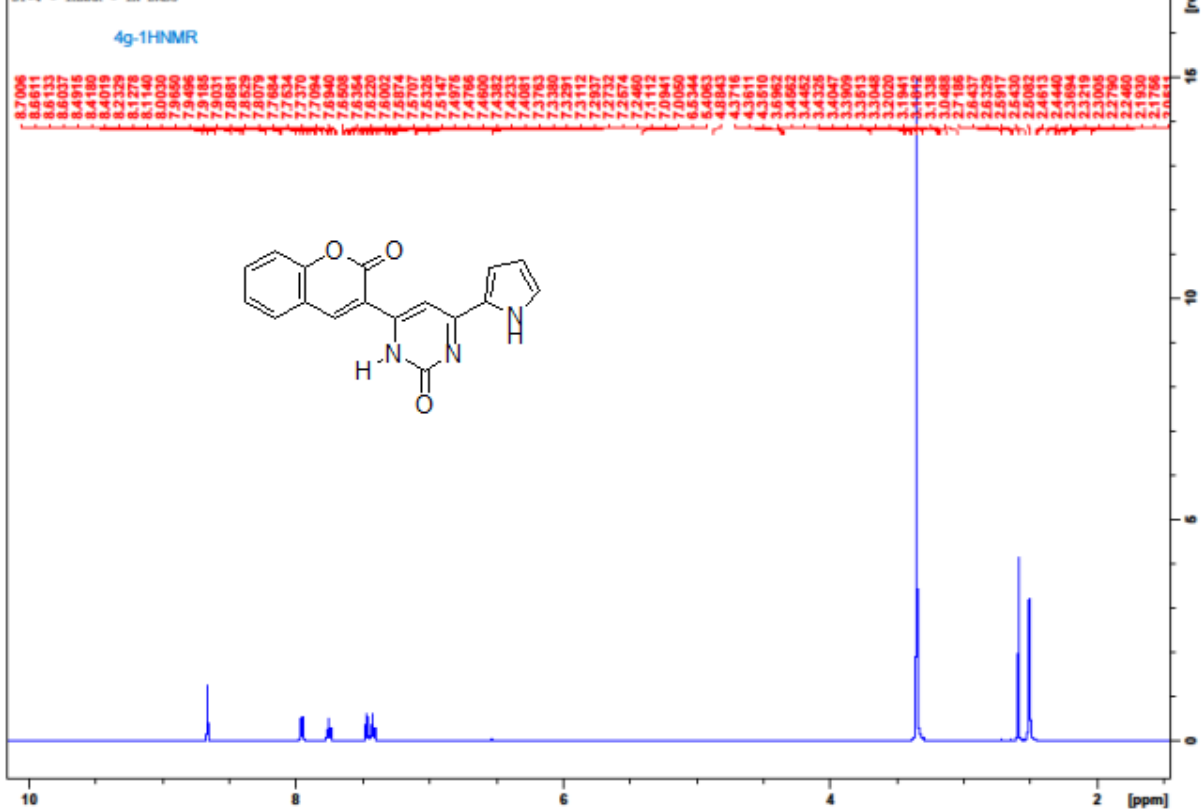



May16-2023 32 1 "D:\Unit data\nmr"

ST-4 - 1HNMNR - IN DMSO

4g-13CNMR

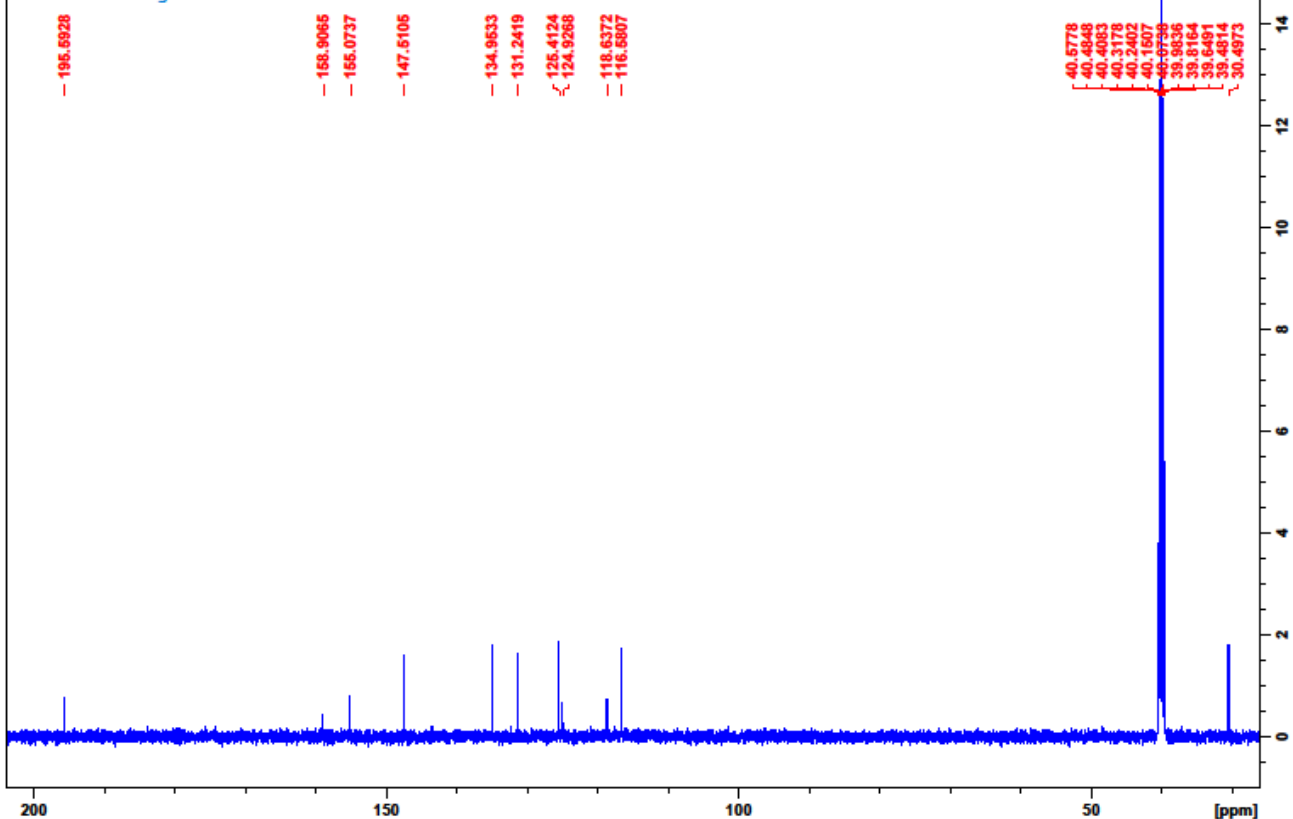

May18-2023 41 1 "D:\Unit data\nmr"

ST-8 1HDMR - IN DMSO

4h-1 1NMR

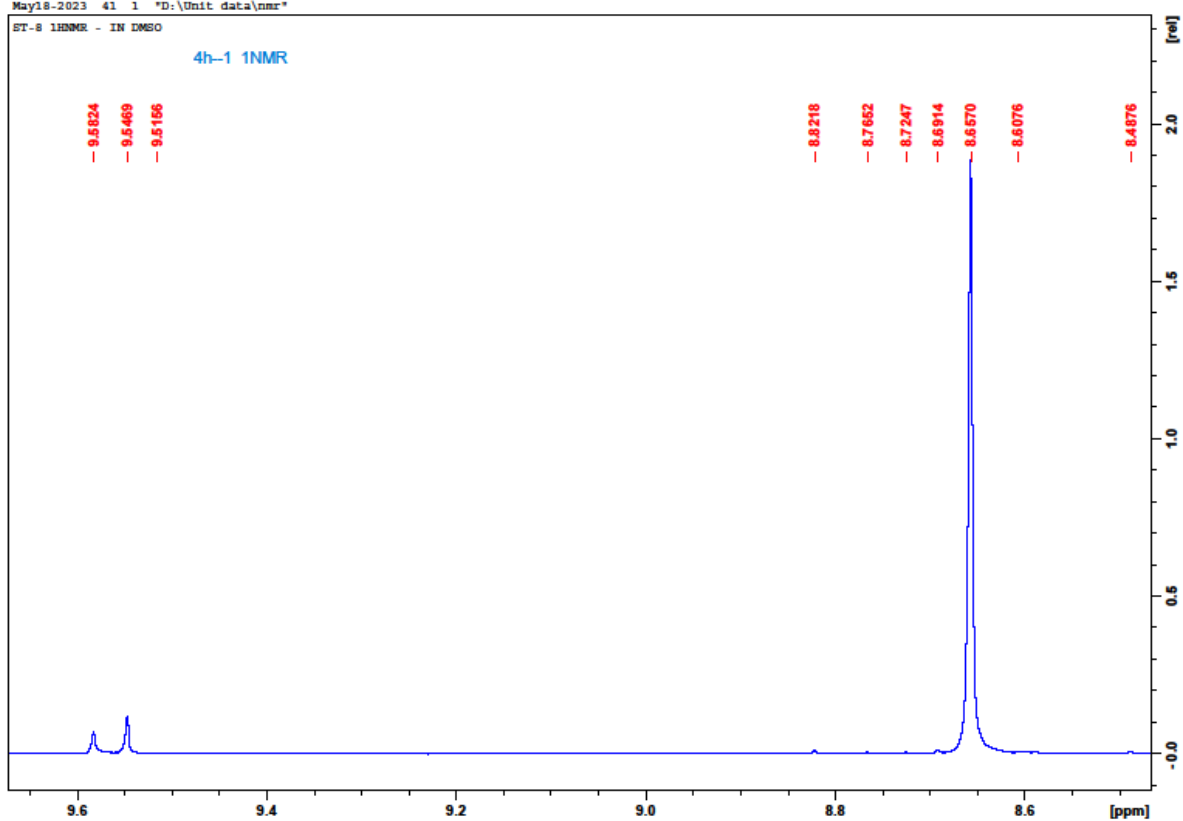

May18-2023 41 1 "D:\Unit data\user"

BT-8 125MHz - 1H DMSO

4h-2 1HNMR

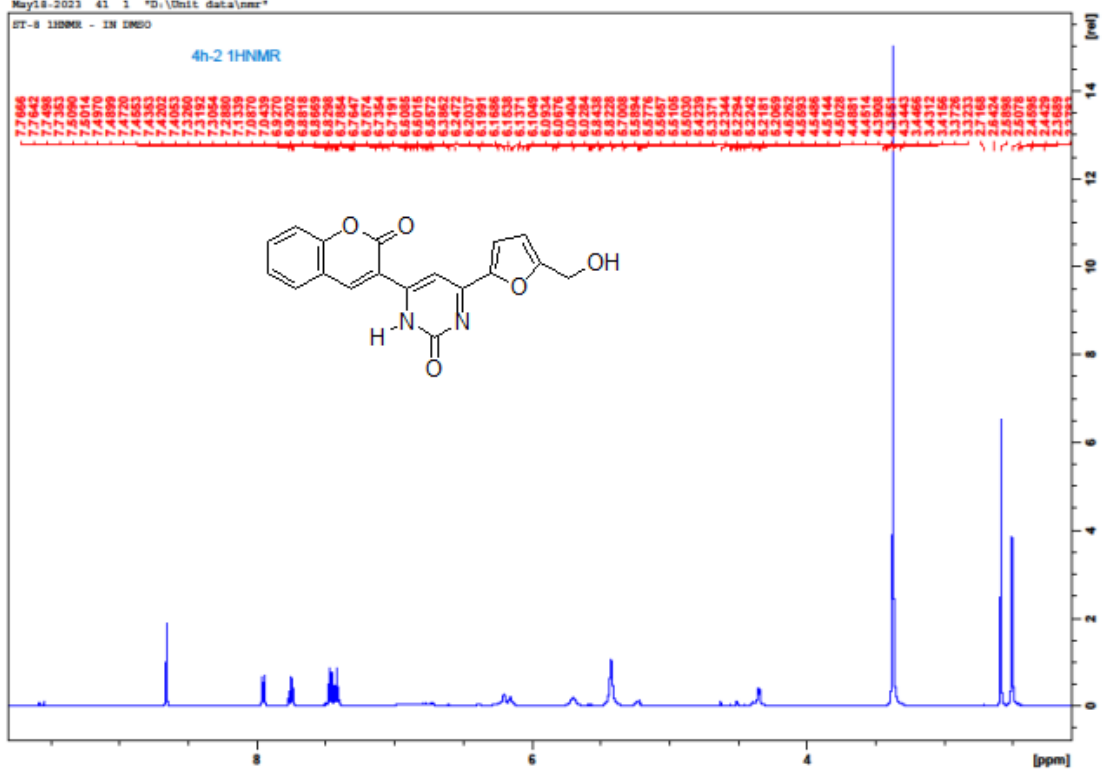

May18-2023 44 1 "D:\Unit data\nmr"

ST-8 C13 - IN DMSO

4h-13 CNMR

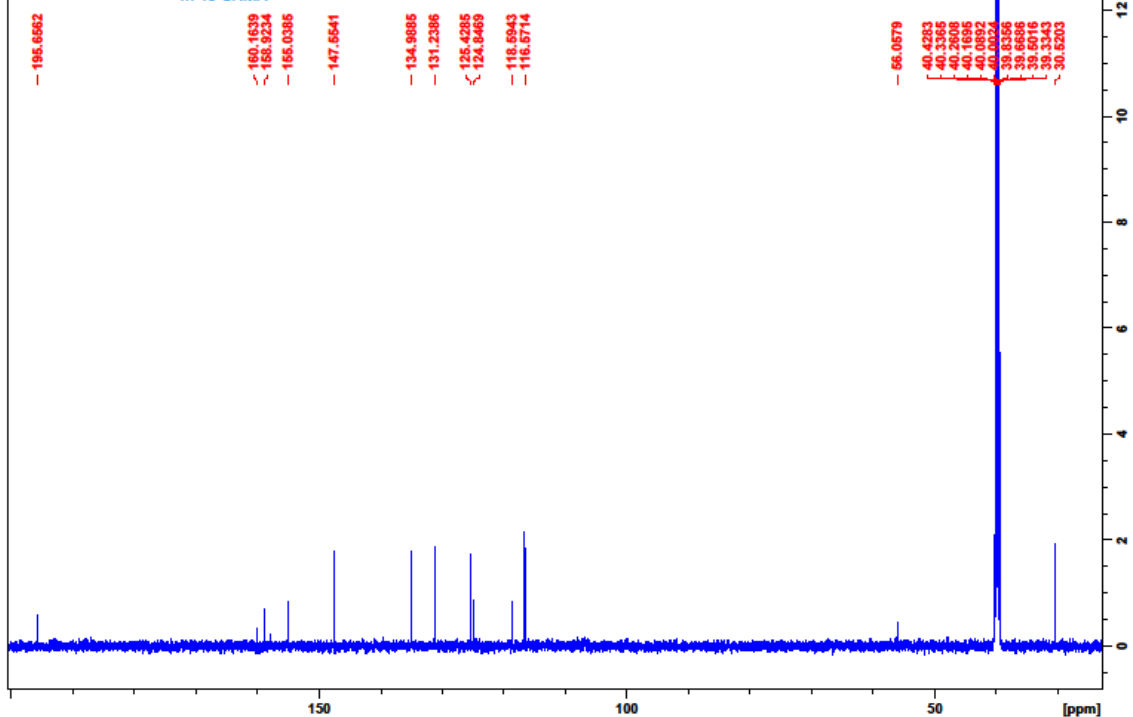

Supplement: s1 [file s1]
